# Supplementary material for: Submergence Gene Sub1A Transfer into Drought-Tolerant japonica Rice DT3 Using Marker-Assisted Selection
Source: MDPI journal article supplement (doi:10.3390/ijms222413365), 2021-12-13
Supplement: s1 [file s1]

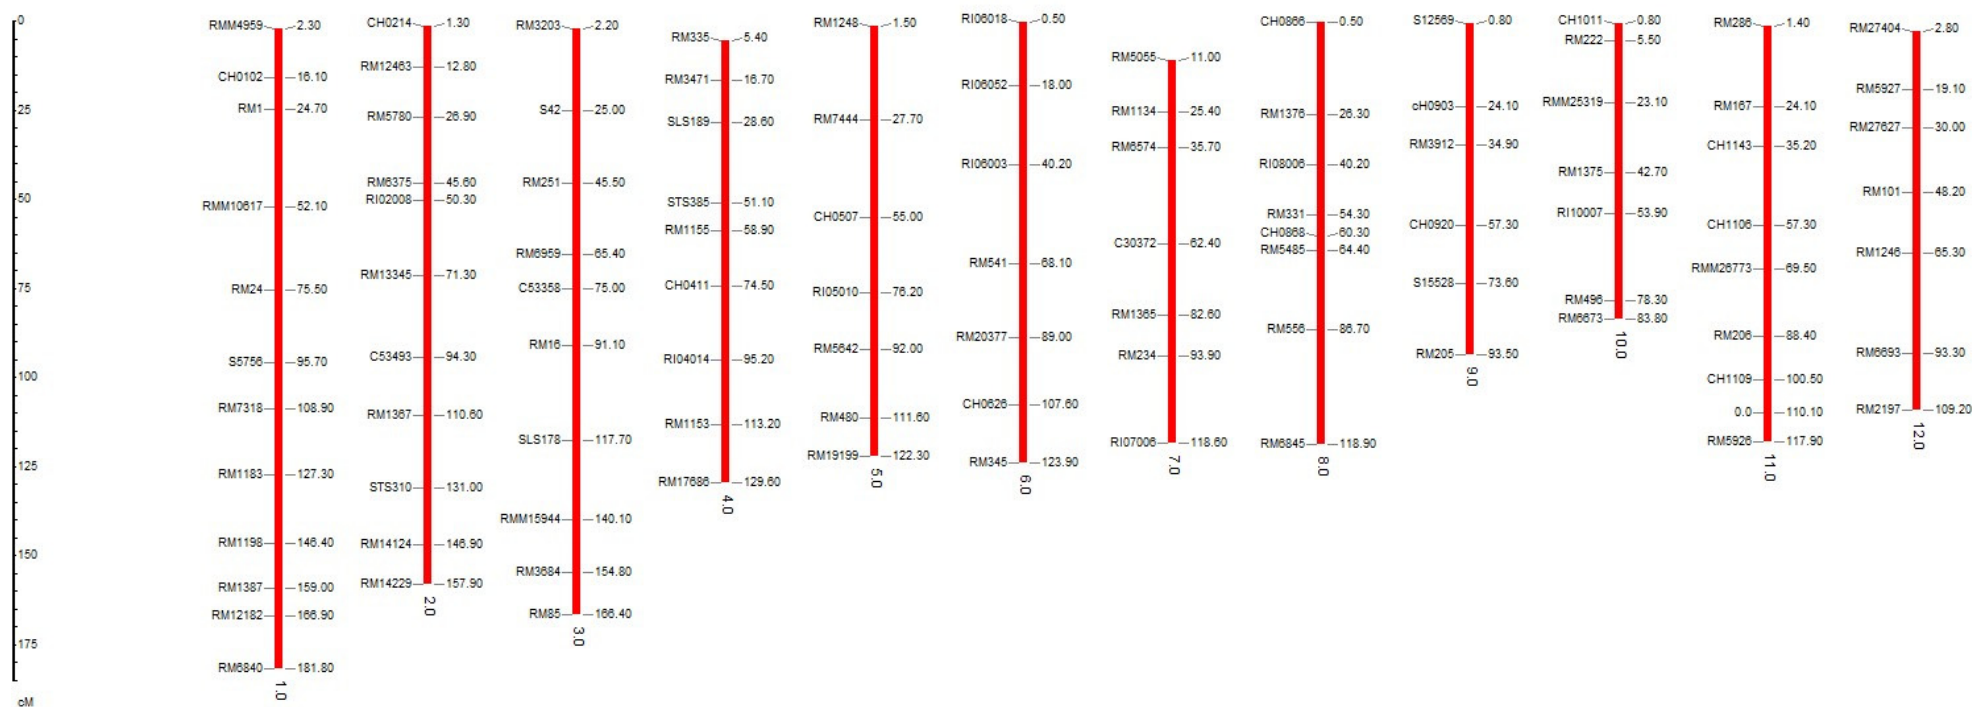

Figure S1. The 100 polymorphic markers used for background selection. The prefixes RM indicates SSR markers; C, E and S indicate STS markers; CH, STS, SLS and RI indicate indel markers.

Table S1. The genome composition of BC3F2 derived from DT3/IR96321-315-240 using 100 polymorphic markers used for marker-assisted selection (MAS).

| Individuals <sup>z</sup> | A (%) <sup>y</sup> | B (%) <sup>x</sup> | H (%) <sup>w</sup> | N (%) <sup>v</sup> | RPG<br>recovered<br>(%) | Total<br>(cM) | Recombinant <sup>u</sup> | H-segments <sup>t</sup> |
|--------------------------|--------------------|--------------------|--------------------|--------------------|-------------------------|---------------|--------------------------|-------------------------|
| DT3                      | 0.0                | 100.0              | 0.0                | 0.0                | 100.00                  | 1493.3        | 0                        | 0                       |
| 1                        | 9.2                | 81.9               | 8.9                | 0.0                | 86.35                   | 1493.3        | 16                       | 6                       |
| 2                        | 0.9                | 93.8               | 5.3                | 0.0                | 96.45                   | 1493.3        | 5                        | 3                       |
| 3                        | 1.3                | 93.6               | 5.1                | 0.0                | 96.15                   | 1493.3        | 5                        | 3                       |
| 4                        | 7.9                | 86.0               | 6.2                | 0.0                | 89.10                   | 1493.3        | 17                       | 6                       |
| 5                        | 6.2                | 82.5               | 11.2               | 0.0                | 88.10                   | 1493.3        | 16                       | 6                       |
| 6                        | 0.9                | 93.9               | 5.2                | 0.0                | 96.50                   | 1493.3        | 6                        | 3                       |
| 7                        | 2.6                | 85.7               | 11.7               | 0.0                | 91.55                   | 1493.3        | 11                       | 5                       |
| 8                        | 3.8                | 90.6               | 5.6                | 0.0                | 93.40                   | 1493.3        | 8                        | 2                       |
| 9                        | 0.9                | 95.6               | 3.5                | 0.0                | 97.35                   | 1493.3        | 3                        | 1                       |
| 10                       | 7.3                | 85.2               | 7.5                | 0.0                | 88.95                   | 1493.3        | 18                       | 6                       |
| 11                       | 2.3                | 89.5               | 8.3                | 0.0                | 93.65                   | 1493.3        | 7                        | 3                       |
| 12                       | 2.7                | 94.6               | 2.8                | 0.0                | 96.00                   | 1493.3        | 8                        | 2                       |
| 13                       | 3.9                | 87.0               | 9.1                | 0.0                | 91.55                   | 1493.3        | 8                        | 4                       |
| 14                       | 2.7                | 85.1               | 12.2               | 0.0                | 91.20                   | 1493.3        | 11                       | 5                       |
| 15                       | 5.7                | 84.8               | 9.5                | 0.0                | 89.55                   | 1493.3        | 12                       | 5                       |
| 16                       | 1.2                | 96.1               | 2.7                | 0.0                | 97.45                   | 1493.3        | 5                        | 2                       |
| 17                       | 0.0                | 96.8               | 3.2                | 0.0                | 98.40                   | 1493.3        | 3                        | 2                       |
| 18                       | 7.1                | 83.0               | 9.9                | 0.0                | 87.95                   | 1493.3        | 12                       | 3                       |
| 19                       | 0.5                | 94.8               | 4.6                | 0.0                | 97.10                   | 1493.3        | 6                        | 3                       |
| 20                       | 4.1                | 92.7               | 3.1                | 0.0                | 94.25                   | 1493.3        | 8                        | 3                       |
| 21                       | 1.6                | 90.2               | 8.2                | 0.0                | 94.30                   | 1493.3        | 9                        | 4                       |
| 22                       | 2.1                | 94.0               | 3.9                | 0.0                | 95.95                   | 1493.3        | 7                        | 2                       |
| 23                       | 1.4                | 90.7               | 7.9                | 0.0                | 94.65                   | 1493.3        | 10                       | 4                       |
| 24                       | 2.2                | 95.1               | 2.7                | 0.0                | 96.45                   | 1493.3        | 9                        | 3                       |
| 25                       | 0.4                | 95.1               | 4.6                | 0.0                | 97.40                   | 1493.3        | 7                        | 3                       |
| 26                       | 2.3                | 94.8               | 2.9                | 0.0                | 96.25                   | 1493.3        | 6                        | 1                       |
| 27                       | 1.9                | 95.2               | 2.9                | 0.0                | 96.65                   | 1493.3        | 8                        | 3                       |
| 28                       | 1.3                | 97.5               | 1.2                | 0.0                | 98.10                   | 1493.3        | 5                        | 2                       |
| 29                       | 10.8               | 83.2               | 6.1                | 0.0                | 86.25                   | 1493.3        | 16                       | 4                       |
| 30                       | 1.0                | 95.2               | 3.8                | 0.0                | 97.10                   | 1493.3        | 5                        | 2                       |
| 31                       | 6.2                | 93.2               | 0.5                | 0.0                | 93.45                   | 1493.3        | 4                        | 1                       |
| 32                       | 1.4                | 93.4               | 5.1                | 0.0                | 95.95                   | 1493.3        | 10                       | 4                       |
| 33                       | 1.4                | 95.7               | 2.8                | 0.0                | 97.10                   | 1493.3        | 6                        | 2                       |
| 34                       | 8.6                | 84.0               | 7.4                | 0.0                | 87.70                   | 1493.3        | 9                        | 3                       |
| 35                       | 1.6                | 96.2               | 2.2                | 0.0                | 97.30                   | 1493.3        | 8                        | 3                       |
| 36                       | 3.9                | 93.9               | 2.2                | 0.0                | 95.00                   | 1493.3        | 8                        | 2                       |
| 37                       | 0.5                | 94.5               | 5.0                | 0.0                | 97.00                   | 1493.3        | 5                        | 2                       |
| 38                       | 1.8                | 96.8               | 1.4                | 0.0                | 97.50                   | 1493.3        | 6                        | 2                       |
| 39                       | 9.9                | 84.7               | 5.4                | 0.0                | 87.40                   | 1493.3        | 14                       | 3                       |
| 40                       | 2.3                | 87.6               | 10.1               | 0.0                | 92.65                   | 1493.3        | 14                       | 6                       |
| 41                       | 5.0                | 88.9               | 6.1                | 0.0                | 91.95                   | 1493.3        | 9                        | 3                       |

|         |       |      |      |     |       |        |    |   |
|---------|-------|------|------|-----|-------|--------|----|---|
| 42      | 5.8   | 89.9 | 4.3  | 0.0 | 92.05 | 1493.3 | 13 | 4 |
| 43      | 3.5   | 83.4 | 13.1 | 0.0 | 89.95 | 1493.3 | 13 | 6 |
| 44      | 11.5  | 82.4 | 6.1  | 0.0 | 85.45 | 1493.3 | 14 | 3 |
| 45      | 2.6   | 89.8 | 7.6  | 0.0 | 93.60 | 1493.3 | 11 | 4 |
| 46      | 5.1   | 84.4 | 10.5 | 0.0 | 89.65 | 1493.3 | 15 | 5 |
| 47      | 10.6  | 81.6 | 7.8  | 0.0 | 85.50 | 1493.3 | 15 | 4 |
| 48      | 7.3   | 89.0 | 3.7  | 0.0 | 90.85 | 1493.3 | 10 | 3 |
| 49      | 3.3   | 96.2 | 0.5  | 0.0 | 96.45 | 1493.3 | 4  | 1 |
| 50      | 7.1   | 87.4 | 5.6  | 0.0 | 90.20 | 1493.3 | 8  | 2 |
| 51      | 1.0   | 93.9 | 5.0  | 0.0 | 96.40 | 1493.3 | 7  | 3 |
| 52      | 7.3   | 84.7 | 8.0  | 0.0 | 88.70 | 1493.3 | 18 | 6 |
| 53      | 4.8   | 90.4 | 4.8  | 0.0 | 92.80 | 1493.3 | 9  | 4 |
| 54      | 2.7   | 93.2 | 4.1  | 0.0 | 95.25 | 1493.3 | 8  | 2 |
| 55      | 3.8   | 88.7 | 7.5  | 0.0 | 92.45 | 1493.3 | 6  | 3 |
| 56      | 5.1   | 86.3 | 8.6  | 0.0 | 90.60 | 1493.3 | 14 | 5 |
| 57      | 3.3   | 88.5 | 8.2  | 0.0 | 92.60 | 1493.3 | 12 | 4 |
| 58      | 1.4   | 95.3 | 3.3  | 0.0 | 96.95 | 1493.3 | 6  | 2 |
| 59      | 10.8  | 84.9 | 4.3  | 0.0 | 87.05 | 1493.3 | 11 | 3 |
| 60      | 1.1   | 95.5 | 3.4  | 0.0 | 97.20 | 1493.3 | 4  | 1 |
| 61      | 0.0   | 99.1 | 0.9  | 0.0 | 99.55 | 1493.3 | 3  | 2 |
| 62      | 1.3   | 93.8 | 5.0  | 0.0 | 96.30 | 1493.3 | 4  | 2 |
| 63      | 2.0   | 96.7 | 1.2  | 0.0 | 97.30 | 1493.3 | 4  | 1 |
| 64      | 5.9   | 93.2 | 0.9  | 0.0 | 93.65 | 1493.3 | 5  | 1 |
| 65      | 5.4   | 88.0 | 6.6  | 0.0 | 91.30 | 1493.3 | 9  | 3 |
| 66      | 6.2   | 81.9 | 11.9 | 0.0 | 87.85 | 1493.3 | 18 | 6 |
| 67      | 5.7   | 84.5 | 9.8  | 0.0 | 89.40 | 1493.3 | 14 | 5 |
| 68      | 8.8   | 84.1 | 7.1  | 0.0 | 87.65 | 1493.3 | 15 | 4 |
| 69      | 1.3   | 96.2 | 2.5  | 0.0 | 97.45 | 1493.3 | 4  | 1 |
| 70      | 3.3   | 88.4 | 8.3  | 0.0 | 92.55 | 1493.3 | 13 | 5 |
| 71      | 6.3   | 85.7 | 8.0  | 0.0 | 89.70 | 1493.3 | 15 | 5 |
| 72      | 4.1   | 87.9 | 8.0  | 0.0 | 91.90 | 1493.3 | 11 | 4 |
| 73      | 4.7   | 92.5 | 2.8  | 0.0 | 93.90 | 1493.3 | 6  | 2 |
| 74      | 0.0   | 95.5 | 4.5  | 0.0 | 97.75 | 1493.3 | 6  | 3 |
| 75      | 2.7   | 93.4 | 3.9  | 0.0 | 95.35 | 1493.3 | 7  | 3 |
| 76      | 1.2   | 94.7 | 4.1  | 0.0 | 96.75 | 1493.3 | 4  | 2 |
| 77      | 0.0   | 96.0 | 4.0  | 0.0 | 98.00 | 1493.3 | 5  | 3 |
| 78      | 5.3   | 82.9 | 11.8 | 0.0 | 88.80 | 1493.3 | 17 | 5 |
| 79      | 5.5   | 93.2 | 1.3  | 0.0 | 93.85 | 1493.3 | 5  | 1 |
| 80      | 5.5   | 85.4 | 9.1  | 0.0 | 89.95 | 1493.3 | 11 | 3 |
| 81      | 3.5   | 86.3 | 10.2 | 0.0 | 91.40 | 1493.3 | 13 | 4 |
| 82      | 8.5   | 83.1 | 8.4  | 0.0 | 87.30 | 1493.3 | 12 | 4 |
| 83      | 5.9   | 85.8 | 8.3  | 0.0 | 89.95 | 1493.3 | 14 | 4 |
| 84      | 7.8   | 82.3 | 9.9  | 0.0 | 87.25 | 1493.3 | 16 | 5 |
| 85      | 11.5  | 80.9 | 7.6  | 0.0 | 84.70 | 1493.3 | 15 | 4 |
| 86      | 8.0   | 84.7 | 7.3  | 0.0 | 88.35 | 1493.3 | 10 | 2 |
| 87      | 3.9   | 87.7 | 8.4  | 0.0 | 91.90 | 1493.3 | 11 | 3 |
| 88      | 1.6   | 87.1 | 11.2 | 0.0 | 92.70 | 1493.3 | 14 | 7 |
| 89      | 0.7   | 97.7 | 1.6  | 0.0 | 98.50 | 1493.3 | 4  | 1 |
| 90      | 8.1   | 81.3 | 10.6 | 0.0 | 86.60 | 1493.3 | 16 | 6 |
| IR69321 | 100.0 | 0.0  | 0.0  | 0.0 | 0.00  | 1493.3 | 0  | 0 |

---

<sup>z</sup> The arrangement was based on the percentage of genetic similarity with DT3.

<sup>y</sup> The percent of genetic similarity with IR96321-315-240 genome.

<sup>x</sup> The percent of genetic similarity with DT3 genome.

<sup>w</sup> The percent of heterozygote.

<sup>v</sup> The percent of missing data.

<sup>u</sup> The number of chromosome recombination.

<sup>t</sup> The number of heterozygous segments in sample.

Table S2. The grain yield evaluation, seed appearance, and palatability of 28 selected BC<sub>3</sub>F<sub>3</sub> backcross lines in yield trial at the first cropping season in 2019

| Line | Grain yield<br>(kg ha <sup>-1</sup> ) | Seed appearance    |                     |                    |                             | Palatability<br>of head rice |
|------|---------------------------------------|--------------------|---------------------|--------------------|-----------------------------|------------------------------|
|      |                                       | Chalky rice<br>(%) | Seed length<br>(mm) | Seed width<br>(mm) | Seed length-<br>width ratio |                              |
| SU1  | 9350.0                                | 58.8               | 4.17                | 2.71               | 1.54                        | 66.5                         |
| SU3  | 6738.6                                | 42.3               | 4.25                | 2.61               | 1.63                        | 65.0                         |
| SU8  | 4147.0                                | 55.8               | 4.13                | 2.55               | 1.62                        | 61.0                         |
| SU9  | 4692.6                                | 56.7               | 4.19                | 2.61               | 1.61                        | 66.5                         |
| SU10 | 4026.0                                | 21.0               | 4.29                | 2.62               | 1.64                        | 65.5                         |
| SU15 | 3746.6                                | 56.7               | 4.32                | 2.66               | 1.62                        | 73.0                         |
| SU19 | 4320.8                                | 44.5               | 4.24                | 2.70               | 1.57                        | 71.0                         |
| SU33 | 3667.4                                | 55.4               | 4.14                | 2.58               | 1.60                        | - <sup>z</sup>               |
| SU39 | 5130.4                                | 56.6               | 4.20                | 2.75               | 1.53                        | 71.0                         |
| SU40 | 4483.6                                | 48.7               | 4.30                | 2.56               | 1.68                        | 74.0                         |
| SU42 | 5990.6                                | 37.2               | 4.23                | 2.61               | 1.62                        | 67.0                         |
| SU45 | 6063.2                                | 64.9               | 4.20                | 2.60               | 1.62                        | 65.0                         |
| SU46 | 5687.0                                | 38.1               | 4.22                | 2.57               | 1.64                        | 60.0                         |
| SU48 | 5999.4                                | 30.5               | 4.27                | 2.63               | 1.62                        | 75.0                         |
| SU49 | 8338.0                                | 33.7               | 4.26                | 2.55               | 1.67                        | 71.0                         |
| SU52 | 6930.0                                | 28.8               | 4.34                | 2.58               | 1.68                        | 70.0                         |
| SU58 | 6516.4                                | 27.4               | 4.28                | 2.38               | 1.80                        | 64.0                         |
| SU63 | 4105.2                                | 31.2               | 4.32                | 2.57               | 1.68                        | 74.5                         |
| SU69 | 5185.4                                | 10.7               | 4.31                | 2.49               | 1.73                        | 69.5                         |
| SU76 | 6600.0                                | 9.0                | 4.31                | 2.61               | 1.65                        | 74.0                         |
| SU83 | 4655.2                                | 10.3               | 4.26                | 2.29               | 1.86                        | 73.0                         |
| SU89 | 4567.2                                | 18.9               | 4.42                | 2.64               | 1.67                        | 74.0                         |
| SU90 | 5185.4                                | 45.5               | 4.22                | 2.69               | 1.57                        | 70.5                         |
| SU92 | 5348.2                                | 44.2               | 4.38                | 2.73               | 1.60                        | 70.5                         |
| SU94 | 4840.0                                | 28.2               | 4.44                | 2.69               | 1.65                        | 66.5                         |
| SU95 | 5889.4                                | 26.3               | 4.39                | 2.65               | 1.66                        | 67.5                         |
| SU96 | 7156.6                                | 46.8               | 4.29                | 2.69               | 1.59                        | 65.5                         |
| SU98 | 5229.4                                | 63.6               | 4.27                | 2.69               | 1.59                        | 59.0                         |
| mean | 5695.0                                | 39.0               | 4.27                | 2.61               | 1.64                        | 68.5                         |

<sup>z</sup> No data.

Table S3. The agronomic characteristics, grain yield evaluation, and the blast resistance test of IR96321-315-240, DT3, and 17 BC<sub>3</sub>F<sub>4</sub> backcross lines in preliminary yield trial at the second cropping season in 2019

| Line or variety | Agronomic characteristic |                      | Grain yield evaluation             |                              | Blast resistance test |                      |
|-----------------|--------------------------|----------------------|------------------------------------|------------------------------|-----------------------|----------------------|
|                 | Plant height (cm)        | Panicle number (No.) | Grain yield (kg ha <sup>-1</sup> ) | Yield index <sup>z</sup> (%) | The blast code        | The resistance scale |
| IR96321-315-240 | 90.2                     | 19.2                 | 7586.2                             | 102.7                        | 1                     | R                    |
| DT3             | 112.0                    | 8.8                  | 7385.7                             | 100.0                        | 4                     | MR                   |
| SU1             | 109.0                    | 10.4                 | 6826.5                             | 92.4                         | 1                     | R                    |
| SU3             | 110.4                    | 8.0                  | 6662.9                             | 90.2                         | 1                     | R                    |
| SU9             | 112.8                    | 8.4                  | 6662.9                             | 90.2                         | 1                     | R                    |
| SU39            | 120.0                    | 8.2                  | 6882.9                             | 93.2                         | 1                     | R                    |
| SU40            | 109.4                    | 8.0                  | 6725.7                             | 91.1                         | 1                     | R                    |
| SU42            | 104.2                    | 9.4                  | 6505.7                             | 88.1                         | 1                     | R                    |
| SU48            | 93.4                     | 9.8                  | 4557.1                             | 61.7                         | 4                     | MR                   |
| SU49            | 104.0                    | 9.2                  | 6211.8                             | 84.1                         | 4                     | MR                   |
| SU52            | 105.2                    | 9.6                  | 4808.6                             | 65.1                         | 1                     | R                    |
| SU58            | 115.8                    | 8.6                  | 5908.6                             | 80.0                         | 1                     | R                    |
| SU69            | 107.0                    | 10.0                 | 6034.3                             | 81.7                         | 1                     | R                    |
| SU76            | 106.2                    | 9.2                  | 6505.7                             | 88.1                         | 1                     | R                    |
| SU83            | 106.0                    | 10.6                 | 5758.8                             | 78.0                         | 1                     | R                    |
| SU89            | 110.2                    | 8.4                  | 7668.6                             | 103.8                        | 1                     | R                    |
| SU92            | 112.4                    | 11.2                 | 7668.6                             | 103.8                        | 1                     | R                    |
| SU94            | 107.4                    | 9.8                  | 6757.1                             | 91.5                         | 1                     | R                    |
| SU96            | 110.4                    | 13.0                 | 7857.1                             | 106.4                        | 1                     | R                    |

<sup>z</sup>The yield indices are compared with that of DT3.

Table S4. The yield components of IR96321-315-240, DT3, and 11 selected BC<sub>3</sub>F<sub>4</sub> backcross lines in preliminary yield trial at the second cropping season in 2019

| Line or variety | Panicle length<br>(cm) | Panicle weight<br>(g) | Spikelets<br>per panicle (No.) | Seed set<br>(%) | 1000-grain weight<br>(g) |
|-----------------|------------------------|-----------------------|--------------------------------|-----------------|--------------------------|
| IR96321-315-240 | 22.40                  | 3.48                  | 172.90                         | 96.76%          | 20.3                     |
| DT3             | 22.76                  | 4.28                  | 177.05                         | 85.82%          | 25.4                     |
| SU1             | 22.32                  | 4.29                  | 164.30                         | 86.93%          | 29.8                     |
| SU3             | 23.72                  | 4.59                  | 175.15                         | 91.04%          | 28.1                     |
| SU9             | 21.83                  | 4.25                  | 176.15                         | 90.19%          | 19.0                     |
| SU39            | 21.38                  | 3.73                  | 153.40                         | 85.76%          | 26.1                     |
| SU40            | 23.12                  | 3.78                  | 168.50                         | 88.82%          | 23.8                     |
| SU58            | 24.54                  | 4.44                  | 185.10                         | 92.67%          | 24.3                     |
| SU69            | 21.18                  | 3.49                  | 154.95                         | 87.99%          | 25.6                     |
| SU89            | 21.12                  | 3.56                  | 148.56                         | 88.58%          | 24.4                     |
| SU92            | 23.01                  | 4.22                  | 163.30                         | 93.56%          | 26.0                     |
| SU94            | 23.66                  | 4.96                  | 180.50                         | 92.43%          | 26.3                     |
| SU96            | 21.84                  | 4.46                  | 152.15                         | 95.57%          | 29.0                     |

Table S5. The seed appearance and palatability of IR96321-315-240, DT3, and 11 selected BC<sub>3</sub>F<sub>4</sub> backcross lines in preliminary yield trial at the second cropping season in 2019

| Line or variety | Seed appearance |                  |                 |                         |                     | Palatability of head rice |
|-----------------|-----------------|------------------|-----------------|-------------------------|---------------------|---------------------------|
|                 | Chalky rice (%) | Seed length (mm) | Seed width (mm) | Seed length-width ratio | Seed thickness (mm) |                           |
| IR96321-315-240 | 0.4%            | 4.92             | 2.02            | 2.44                    | 1.77                | 44.0                      |
| DT3             | 10.3%           | 4.81             | 2.92            | 1.65                    | 2.06                | 83.5                      |
| SU1             | 20.3%           | 4.86             | 2.94            | 1.65                    | 2.05                | 79.0                      |
| SU3             | 14.6%           | 4.98             | 2.88            | 1.73                    | 2.04                | 81.5                      |
| SU9             | 14.0%           | 4.88             | 2.89            | 1.69                    | 2.06                | 82.5                      |
| SU39            | 14.0%           | 4.84             | 2.98            | 1.62                    | 2.06                | 86.0                      |
| SU40            | 3.4%            | 5.07             | 2.58            | 1.97                    | 1.92                | 87.5                      |
| SU58            | 15.1%           | 4.74             | 2.58            | 1.84                    | 1.97                | 75.0                      |
| SU69            | 3.9%            | 4.90             | 2.59            | 1.89                    | 1.88                | 74.0                      |
| SU89            | 4.2%            | 4.87             | 2.87            | 1.70                    | 2.02                | 80.5                      |
| SU92            | 6.9%            | 4.91             | 2.86            | 1.72                    | 1.98                | 84.0                      |
| SU94            | 8.6%            | 4.81             | 2.90            | 1.66                    | 2.04                | 72.5                      |
| SU96            | 12.5%           | 4.87             | 2.89            | 1.69                    | 1.99                | 78.0                      |



Table S6. Details of functional and linkage markers and their primer sequences used for foreground selection.

| Markers    | Primer sequence       | Annealing<br>temperature (°C) |
|------------|-----------------------|-------------------------------|
| Sub1A1 (F) | CTTCTTGCTCAACGACAACG  | 50.9                          |
| Sub1A1 (R) | TCGATGGGGTCTTGATCTCT  | 50.8                          |
| Sub1AB1(F) | CATGTTCCATAGCCATCGACT | 51.6                          |
| Sub1AB1(R) | GAGCGAAGAGAGCTACCTGAA | 50.7                          |
